# Supplementary material for: Supercritical behavior in free radical polymerization of ethylene in the medium pressure range
Source: Royal Society of Chemistry journal article supplement (doi:10.1039/c004447d), 2010-01-01
Supplement: c004447d.pdf [file c004447d.pdf]

## **Electronic Supplementary Information**

# **Supercritical Behavior in Free Radical Polymerization of Ethylene in the Medium Pressure Range**

Etienne Grau, Jean-Pierre Broyer, Christophe Boisson, Roger Spitz, Vincent Monteil

### **Polyethylene characterizations**

Molecular weights of polyethylenes were determined by size exclusion chromatography (SEC) using a Waters Alliance GPCV 2000 instrument (columns: PLgel Olexis); two detectors (viscosimeter and refractometer) in trichlorobenzene (flow rate: 1 mL/min) at 150°C. The system was calibrated with polystyrene standards using universal calibration. Differential scanning calorimetry (DSC) was performed on a Mettler Toledo DSC1 at a heating rate of 5 K/min. Two successive heating and cooling of the samples were performed. We have considered data ( $T_m$  values, crystallinity) obtained during the second heats.

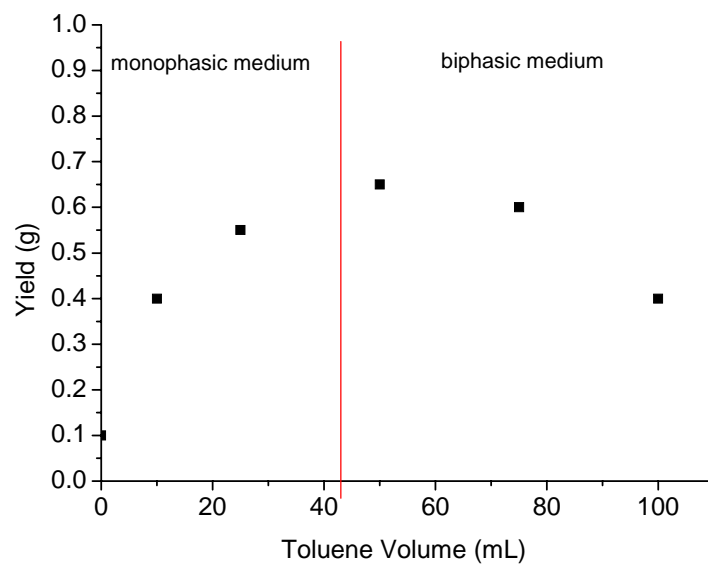

Figure S1: Toluene volume influence on radical polymerization of ethylene

■ : 50mg AIBN, 4h at 70°C under 100 bar of ethylene pressure

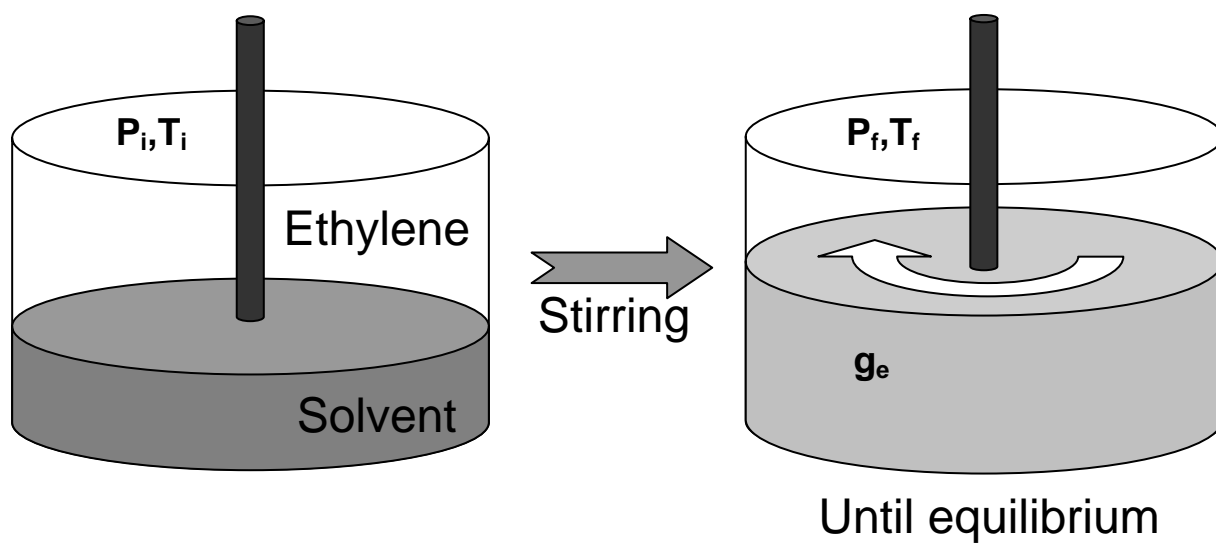

Figure S2: Modus operandi to calculate ethylene solubility

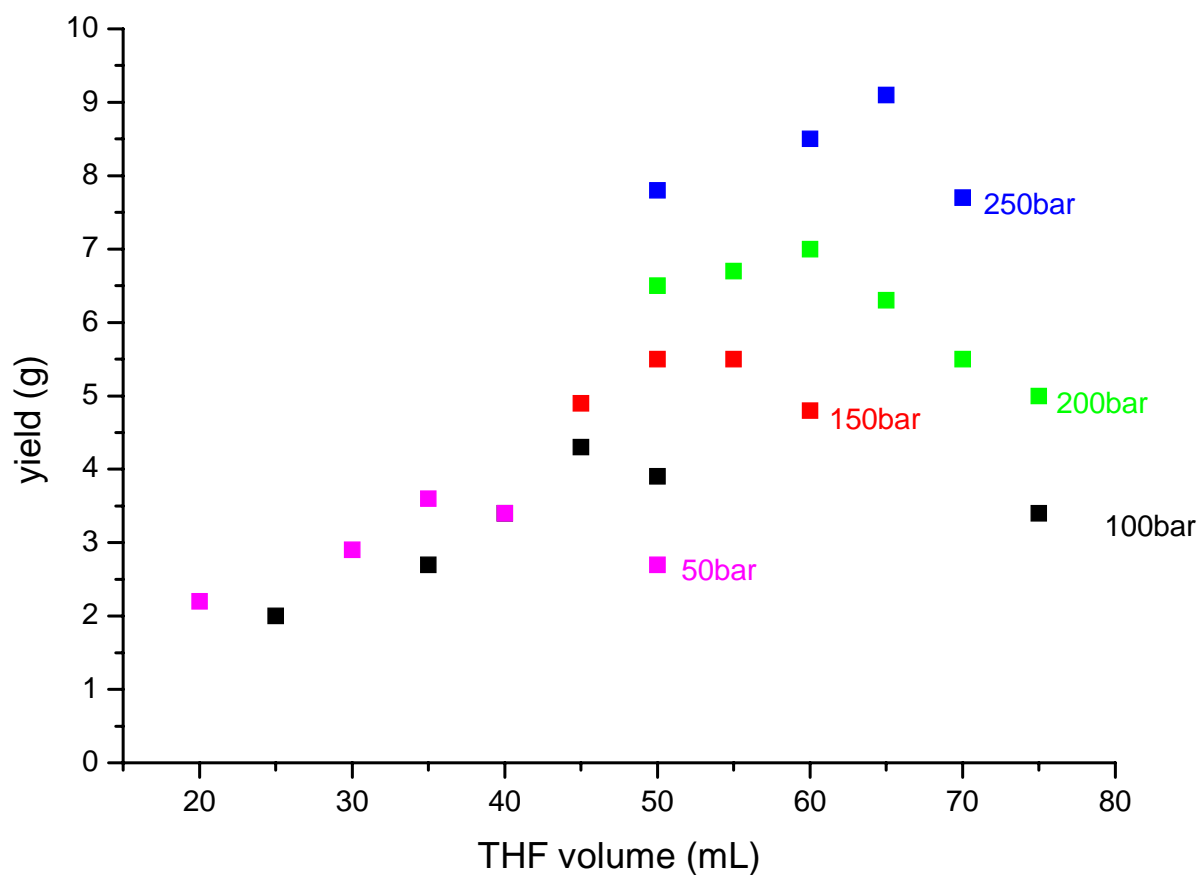

Figure S3: THF volume influence on radical polymerization of ethylene at different pressures

■ : 50mg AIBN, 4h at 70°C under 50 bar of ethylene pressure

■ : 50mg AIBN, 4h at 70°C under 100 bar of ethylene pressure (figure 1)

■ : 50mg AIBN, 4h at 70°C under 150 bar of ethylene pressure

■ : 50mg AIBN, 4h at 70°C under 200 bar of ethylene pressure

■ : 50mg AIBN, 4h at 70°C under 250 bar of ethylene pressure

Table S1 : THF volume influence on radical polymerization of ethylene (experimental data of Figure 1)

| Run | THF volume (mL) | Yield (g) | Melting point (°C) | Crystallinity (%) | Mn (g/mol) | PDI |
|-----|-----------------|-----------|--------------------|-------------------|------------|-----|
| 1   | 0               | 0.1       | 105.3              | 46                | 3010       | 1.3 |
| 2   | 2               | 0.4       | 113.6              | 64                | 4440       | 1.8 |
| 3   | 5               | 0.5       | 115.7              | 65                | 4660       | 1.3 |
| 4   | 10              | 0.9       | 116.1              | 61                | 3600       | 1.9 |
| 5   | 25              | 2.0       | 115.7              | 58                | 3350       | 1.7 |
| 6   | 35              | 2.7       | 115.6              | 58                | 2380       | 1.3 |
| 7   | 40              | 3.4       | 115.4              | 60                | 2760       | 1.6 |
| 8   | 45              | 4.3       | 115.3              | 62                | 2240       | 1.3 |
| 9   | 50              | 3.9       | 115.2              | 58                | 1190       | 1.9 |
| 10  | 75              | 3.4       | 105.7              | 55                | 820        | 1.5 |
| 11  | 100             | 3.3       | 101.9              | 55                | 740        | 1.5 |

Reactions were carried at 70°C under ethylene pressure (100 bar) during 4h with 50 mg AIBN

Table S2 : Toluene volume influence on radical polymerization of ethylene (experimental data of Figure S1)

| <b>Run</b> | <b>Toluene volume (mL)</b> | <b>Yield (g)</b> | <b>Melting point (°C)</b> | <b>Crystallinity (%)</b> | <b>Mn (g/mol)</b> | <b>PDI</b> |
|------------|----------------------------|------------------|---------------------------|--------------------------|-------------------|------------|
| 12         | 0                          | 0.1              | 105.3                     | 46                       | 3010              | 1.3        |
| 13         | 10                         | 0.4              | 114.7                     | 55                       | 4120              | 1.5        |
| 14         | 25                         | 0.55             | 116.1                     | 52                       | 2670              | 1.5        |
| 15         | 50                         | 0.65             | 115.9                     | 63                       | 2340              | 1.9        |
| 16         | 75                         | 0.6              | 113.7                     | 57                       | 2500              | 1.4        |
| 17         | 100                        | 0.4              | 108.7                     | 62                       | 1470              | 1.4        |

Reactions were carried at 70°C under ethylene pressure (100 bar) during 4h with 50 mg AIBN

Table S3 : Influence of the concentration of initiator on radical polymerization of ethylene  
(experimental data of Figure 2)

| <b>Run</b> | <b>Solvent</b> | <b>AIBN (mg)</b> | <b>Yield (g)</b> |
|------------|----------------|------------------|------------------|
| 17         | THF            | 15               | 0.6              |
| 18         | THF            | 25               | 2.2              |
| 19         | THF            | 50               | 3.9              |
| 20 (9)     | THF            | 80               | 5.0              |
| 21         | THF            | 105              | 6.9              |
| 22         | THF            | 212              | 8.4              |
| 23         | THF            | 500              | 14               |
| 24         | Toluene        | 10               | 0.3              |
| 25         | Toluene        | 20               | 0.4              |
| 26 (15)    | Toluene        | 51               | 0.7              |
| 27         | Toluene        | 70               | 0.9              |
| 28         | Toluene        | 224              | 1.5              |
| 29         | Toluene        | 512              | 2                |

Reactions were carried at 70°C under 100 bar of ethylene during 4 hours in 50 mL of solvent

Table S4: Experimental determination of the transition at different ethylene pressure  
(experimental data of Figure 7)

| <b>Run</b> | <b>Pressure (bar)</b> | <b>Volume (mL)</b> | <b>Yield (g)</b> |
|------------|-----------------------|--------------------|------------------|
| 30         | 25                    | 10                 | 0.6              |
| 31         | 25                    | 20                 | 1.2              |
| 32         | 25                    | 25                 | 1.7              |
| 33         | 25                    | 30                 | 1.5              |
| 34         | 25                    | 50                 | 1.3              |
| 35         | 50                    | 20                 | 2.2              |
| 36         | 50                    | 30                 | 2.9              |
| 37         | 50                    | 35                 | 3.6              |
| 38         | 50                    | 40                 | 3.4              |
| 39         | 50                    | 50                 | 2.7              |
| 40         | 150                   | 45                 | 4.9              |
| 41         | 150                   | 50                 | 5.5              |
| 42         | 150                   | 55                 | 5.5              |
| 43         | 150                   | 60                 | 4.8              |
| 44         | 200                   | 50                 | 6.5              |
| 45         | 200                   | 55                 | 6.7              |
| 46         | 200                   | 60                 | 7.0              |
| 47         | 200                   | 65                 | 6.3              |
| 48         | 200                   | 70                 | 5.5              |
| 49         | 200                   | 75                 | 5.0              |



|    |     |    |     |
|----|-----|----|-----|
| 50 | 250 | 50 | 7.8 |
| 51 | 250 | 60 | 8.5 |
| 52 | 250 | 65 | 9.1 |
| 53 | 250 | 70 | 7.7 |

---

Reactions were carried at 70°C under ethylene pressure during 4 hours in THF
